# Supplementary material for: Limited protection of macro-aggregate-occluded organic carbon in Siberian steppe soils
Source: Copernicus journal article supplement (doi:10.5194/bg-14-2627-2017), 2017-05-24
Supplement: Supplementary file [file bg-14-2627-2017-supplement-title-page.pdf › bg-14-2627-2017-supplement-title-page.pdf]

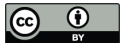

## *Supplement of*

# **Limited protection of macro-aggregate-occluded organic carbon in Siberian steppe soils**

**Norbert Bischoff et al.**

*Correspondence to:* Norbert Bischoff (bischoff@ifbk.uni-hannover.de)

- bg-14-2627-2017-supplement-title-page.pdf
- Supplements
  - Data.csv
  - bg-2016-518-supplement-version4.pdf

The copyright of individual parts of the supplement might differ from the CC-BY 3.0 licence.
